# Supplementary material for: A unique cysteine-rich zinc finger domain present in a majority of class II ribonucleotide reductases mediates catalytic turnover
Source: PubMed Central journal article supplement (PMC5704485; doi:10.1074/jbc.m117.806331), 2017-10-02
Supplement: 10.1074_M117.806331_jbc.M117.806331-1.pdf [file 10.1074_M117.806331_jbc.M117.806331-1.pdf]

# Supplemental Data: A unique cysteine-rich Zn-finger domain present in a majority of class II ribonucleotide reductases mediates catalytic turnover

Christoph Loderer<sup>‡</sup>, Venkateswara Rao Jonna<sup>§</sup>, Mikael Crona<sup>1#</sup>, Inna Rozman Grinberg<sup>‡</sup>, Margareta Sahlin<sup>‡</sup>, Anders Hofer<sup>§</sup>, Daniel Lundin<sup>‡\*</sup>, Britt-Marie Sjöberg<sup>‡\*</sup>

<sup>‡</sup>Department of Biochemistry and Biophysics, Stockholm University and <sup>§</sup>Department of Medical Biochemistry, Umeå University, Sweden

<sup>#</sup>current address: Swedish Orphan Biovitrum AB, Solna, Sweden

\*corresponding authors:

Daniel Lundin, telephone: +46-8-52481520, fax: +46-8-155597, e-mail: daniel.lundin@dbb.su.se

Britt-Marie Sjöberg, telephone: +46-8-164150, fax: +46-8-155597, e-mail: britt-marie.sjoberg@dbb.su.se

## Full phylogenetic trees

Complete tree files in nexml format (from Dendroscope) have been deposited to Figshare.

Full NrdJ tree: <https://doi.org/10.17045/sthlmuni.5178415>

Tree without NrdJm: <https://doi.org/10.17045/sthlmuni.5178424>

## Sequence analysis matrix

**Supplementary table S1. Analysis of sequence clusters.** Representative sequences of NrdJ sequence clusters, excluding subclass NrdJm, with information about presence/absence of the CRD, subclass, presence of a separate gene encoding the CRD, cysteine pair in C-terminus (CRD or not) and alternative NrdJ with CRD elsewhere in genome.

The table is available as separate excel file: *Supplementary\_Table\_S1.xlsx*
